# Supplementary material for: Phage Cocktail Targeting STEC O157:H7 Has Comparable Efficacy and Superior Recovery Compared with Enrofloxacin in an Enteric Murine Model
Source: PubMed Central journal article supplement (PMC9241756; doi:10.1128/spectrum.00232-22), 2022-05-10
Supplement: spectrum.00232-22-s001.pdf [file spectrum.00232-22-s001.pdf]

1 **Supplementary Materials**

2 **Journal name: Microbiology Spectrum**

3 Phage cocktail targeting STEC O157:H7 has comparable efficacy and superior recovery  
4 compared to enrofloxacin in an enteric murine model

5  
6 Yuxin Wang<sup>1</sup>, Dinesh Subedi<sup>2</sup>, Jin Li<sup>1</sup>, Jiaoling Wu<sup>1</sup>, Jianluan Ren<sup>1</sup>, Feng Xue<sup>1</sup>,  
7 Jianjun Dai<sup>1,3</sup>, Jeremy J. Barr<sup>2</sup>, Fang Tang<sup>1\*</sup>

8  
9 1. MOE Joint International Research Laboratory of Animal Health and Food Safety;  
10 Key Laboratory of Animal Bacteriology, Ministry of Agriculture; College of Veterinary  
11 Medicine, Nanjing Agricultural University, Nanjing, 210095, China

12 2. School of Biological Sciences, Monash University, 3800 Clayton, Victoria, Australia

13 3. School of Life Science and Technology, China Pharmaceutical University, Nanjing,  
14 China

15  
16 Running Title: Comparison of phage and antibiotic treatment

17  
18 \*Corresponding author: Fang Tang

19 College of Veterinary Medicine, Nanjing Agricultural University, No.1 Weigang,  
20 Nanjing, 210095, Jiangsu province, P. R. China

21 Phone: +86(0) 25-84396517

22 Fax: +86(0) 25-84396517

23 E-mail: tfalice@126.com

24

25

26 **MATERIALS AND METHODS**

27 **Morphology observation.** Phage solutions were suspended in doubly deionized H<sub>2</sub>O,  
28 transferred onto a copper grid, and subjected to negative staining with Phospho-tungstic  
29 acid (PTA, 2%, w/v). Phage morphology was observed using an H 7650 transmission  
30 electron microscope (TEM; Hitachi, Japan).

31 **pH stability.** One hundred microliter of phage cocktail was mixed with 900  $\mu$ L of  
32 SM buffer in different pH values (2, 3, 4, 5, 6, 7, 8, 9, 10, 11, 12, 13, 14), then incubated  
33 in a water bath at 37°C. Samples were taken out after 0.5 h and 1 h, and the potency  
34 was measured by double-layer agar method.

35 **Thermal stability.** One milliliter of phage cocktail was incubated in a water bath at  
36 50°C, 60°C, and 70°C, respectively. Samples were taken out every 10 min to measure  
37 the titers by double-layer agar method.

38 **Optimal multiplicity of infection (MOI).** The host bacteria STEC O157:H7  
39 EDL933 were cultured to the logarithmic phase and mixed with phage at different  
40 multiplicity of infection: 0.01, 0.1, 1, 10, and 100. After incubated at 37°C for 5h, the  
41 phage titer of supernatant was determined by double-layer agar method. The group with  
42 the highest titer is the MOI of the phage.

43 **One-step growth curve.** Host bacteria was cultured to the logarithmic phase ( $10^8$   
44 CFU/mL) and mixed with phage cocktail ( $10^7$  PFU/mL) in equal volumes, incubated at  
45 37°C for 15 min, centrifuged at 10,000rpm for 10 min. The pellet was resuspended in  
46 5 mL of LB broth and incubated in a shaker at 37°C. For the first 15 min, 100  $\mu$ L of  
47 sample was taken out every 5 min, and then every 15 min until 120 min. Samples were  
48 centrifuged at 10,000 rpm for 1 min, and the supernatants were diluted into an  
49 appropriate gradient to test the titer by double-layer agar method.

50

51 **Table S1** Primers for detection of STEC O157:H7 (1, 2).

| Primers | Primer sequences (5'-3') | Target gene | Annealing temperature (°C) | Product size (bp) |
|---------|--------------------------|-------------|----------------------------|-------------------|
| O157-F  | AAGATTGCGCTGAAGCCTTTG    | <i>rfbE</i> | 55                         | 497               |
| O157-R  | CATTGGCATCGTGTGGACAG     |             |                            |                   |
| H7-F    | GCGCTGTCGAGTTCTATCGAGC   | <i>fliC</i> | 55                         | 625               |
| H7-R    | CAACTGTGACTTTATCGCCATTCC |             |                            |                   |

52

53

54 **Table S2** 16S rRNA gene-targeted group-specific primers used in this study (3).

| Primers   | Primer sequences (5'-3')  | Target group                                     | Product size (bp) |
|-----------|---------------------------|--------------------------------------------------|-------------------|
| Bac-F     | GTTTAATTCGATGATACGCGAG    | <i>Bacteroidetes</i>                             | 122               |
| Bac-R     | TTAASCCGACACCTCACGG       |                                                  |                   |
| Firm-F    | GGAGYATGTGGTTTAATTCGAAGCA | <i>Firmicutes</i>                                | 126               |
| Firm-R    | AGCTGACGACAACCATGCAC      |                                                  |                   |
| Act-F     | TGTAGCGGTGGAATGCGC        | <i>Actinobacteria</i>                            | 277               |
| Act-R     | AATTAAGCCACATGCTCCGCT     |                                                  |                   |
| Sac-F     | AAGAGAACTGTGCCTTCGG       | “ <i>Candidatus</i><br><i>Saccharibacteria</i> ” | 187               |
| Sac-R     | GCGTAAGGGAAATACTGACC      |                                                  |                   |
| Defer-F   | CTATTTCCAGTTGCTAACGG      | <i>Deferribacteres</i>                           | 150               |
| Defer-R   | GAGHTGCTTCCCTCTGATTATG    |                                                  |                   |
| Ver-F     | TCAKGTCAAGTATGGCCCTTAT    | <i>Verrucomicrobia</i>                           | 97                |
| Ver-R     | CAGTTTTYAGGATTTCCCTCCGCC  |                                                  |                   |
| Ten-F     | ATGTGTAGCGGTAAAATGCGTAA   | <i>Tenericutes</i>                               | 200               |
| Ten-R     | CMTACTTGCGTACGTACTACT     |                                                  |                   |
| Beta-F    | AACGCGAAAAACCTTACCTACC    | <i>Betaproteobacteria</i>                        | 174               |
| Beta-R    | TGCCCTTTCGTAGCAACTAGTG    |                                                  |                   |
| Epsilon-F | TAGGCTTGACATTGATAGAATC    | <i>Epsilonproteobacteria</i>                     | 189               |
| Epsilon-R | CTTACGAAGGCAGTCTCCTTA     |                                                  |                   |
| Gamma-F   | GCTAACGCATTAAGTRYCCCG     | <i>Delta- and</i><br><i>Gammaproteobacteria</i>  | 189               |
| Gamma-R   | GCCATGCRGCACCTGTCT        |                                                  |                   |
| Uni-F     | AAACTCAAAGKAATTGACGG      | Universal                                        | 136               |
| Uni-R     | CTCACRRCACGAGCTGAC        |                                                  |                   |

55 Note: Nucleotide symbols: R = A or G; Y = C or T; N = any nucleotide; W = A or T;

56 M = A or C; K = T or G; S = C or G; and H = A/C/T.

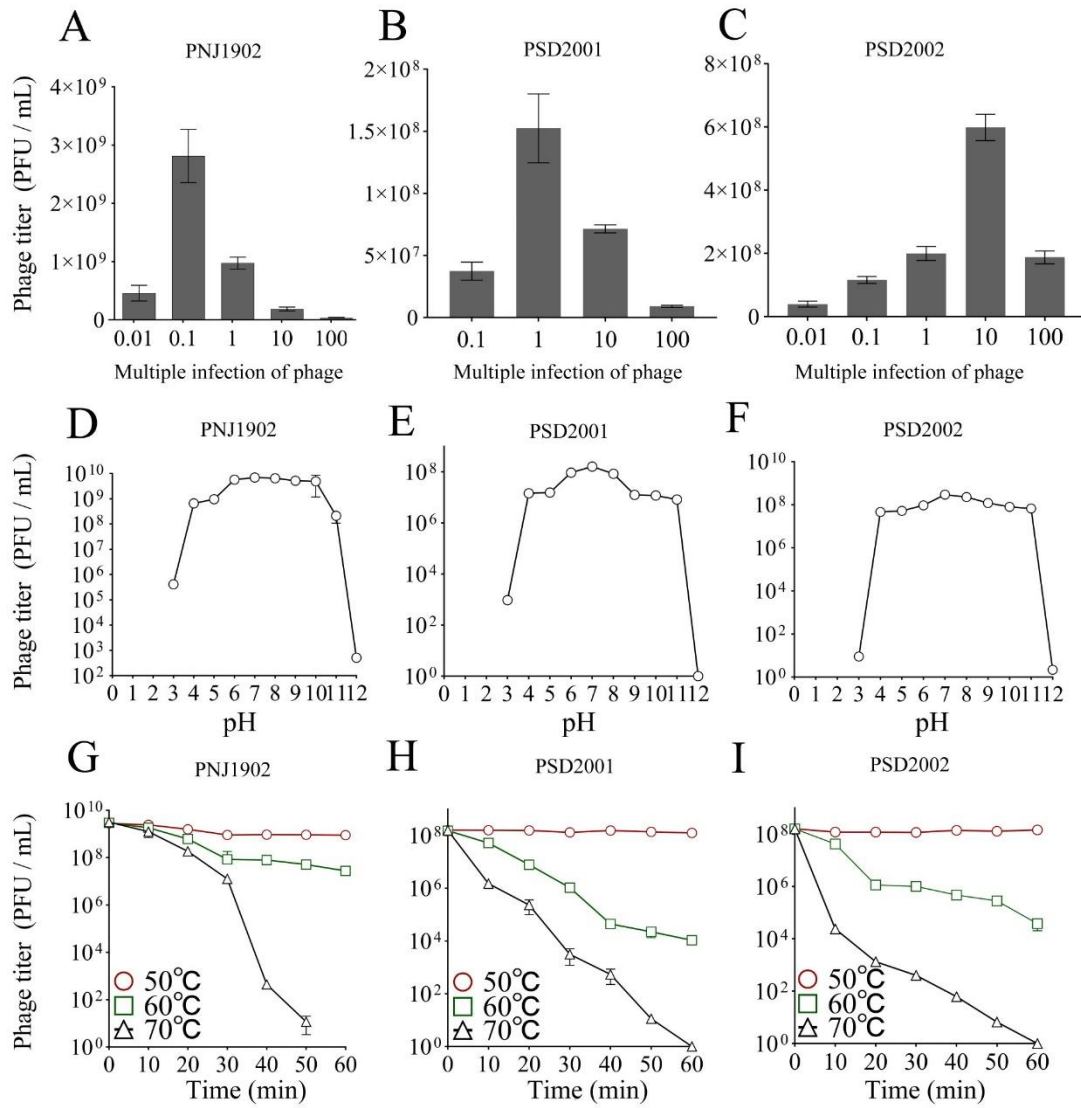

57

58 **Fig.S1** Optimal MOI, pH and temperature resistance of phages. Optimal MOI of the  
 59 phage PNJ1902(A), PSD2001(B), PSD2002(C); pH stability of the phage PNJ1902(D),  
 60 PSD2001(E), PSD2002(F); Temperature tolerance of phage PNJ1902(G),  
 61 PSD2001(H), PSD2002(I).

62

63

64

65

66

67

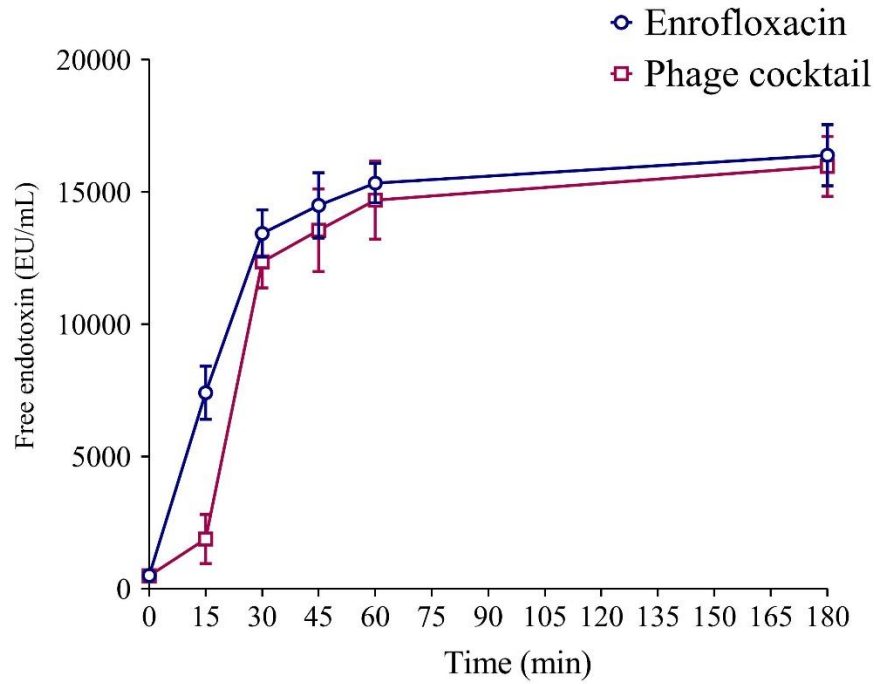

68

69 **Fig. S2** Concentration of released endotoxin. The concentration of endotoxin released  
70 by STEC exposed to enrofloxacin, and phage cocktail *in vitro* was tested. The data is  
71 represented by mean  $\pm$  SD.

72

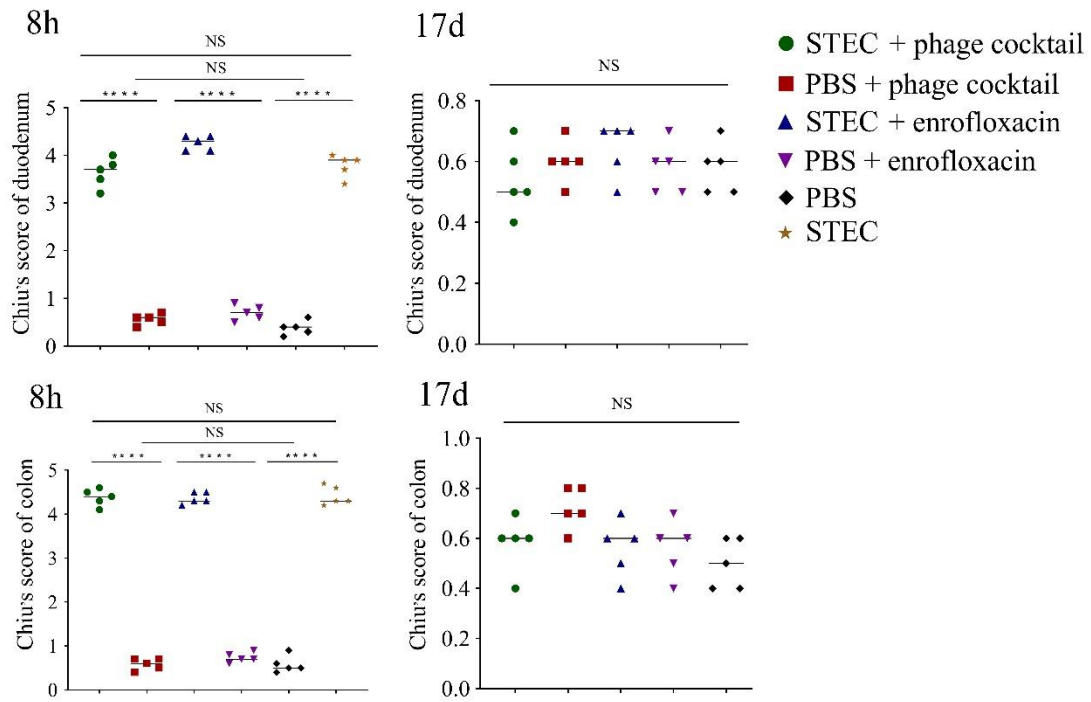

73

74 **Fig. S3** Chiu's analysis of mouse gut at 8h and 17d. Chiu's Pathology score was used to  
 75 quantify the pathological changes of duodenum and colon of mice. Statistical analyses  
 76 were performed by one-way analysis of variance (ANOVA). Significant difference  
 77 between STEC+ enrofloxacin and STEC+ phage cocktail is indicated in the figures by  
 78 asterisks (\*,  $P < 0.05$ ; \*\*,  $P < 0.01$ ; \*\*\*,  $P < 0.001$ ; \*\*\*\*,  $P < 0.0001$ ).

79

80

81

82

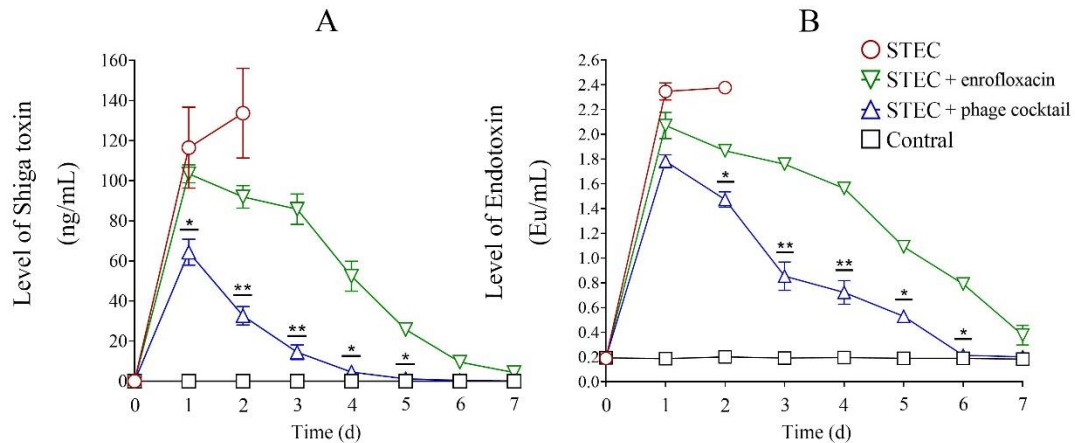

83

84 **Fig.S4** Shiga toxin and endotoxin released in mice serum. Serum of mice in different  
 85 groups, including STEC+ enrofloxacin, STEC+ phage cocktail, STEC and blank  
 86 control were collected, and the concentration of Shiga toxin **(A)** and endotoxin **(B)**  
 87 were detected. Statistical analyses were performed by one-way analysis of variance  
 88 (ANOVA). Significant difference between STEC+ enrofloxacin and STEC+ phage  
 89 cocktail is indicated in the figures by asterisks (\*,  $P < 0.05$ ; \*\*,  $P < 0.01$ ).

90

## 91 References

- 92 1. García-Sánchez, A., Sánchez, S., Rubio, R., Pereira, G., Alonso, J. M., Mendoza, J. ,  
 93 Rey, J. 2007. Presence of Shiga toxin-producing *E. coli* O157:H7 in a survey of wild  
 94 artiodactyls. *Vet Microbiol* 121, (3-4): 373-377.  
 95 <https://doi.org/10.1016/j.vetmic.2006.12.012>
- 96 2. Sánchez, S., Martínez, R., García, A., Blanco, J., Echeita, A., Mendoza, J., Rey, J. ,  
 97 Alonso, J. M. 2010. Shiga toxin-producing *Escherichia coli* O157:H7 from extensive  
 98 cattle of the fighting bulls breed. *Res Vet Sci* 88(2): 208-210.  
 99 <https://doi.org/10.1016/j.rvsc.2009.07.014>
- 100 3. Yang YW, Chen MK, Yang BY, Huang XJ, Zhang XR, He LQ, Zhang J, Hua ZC.  
 101 2015. Use of 16S rRNA gene-targeted group-specific primers for real-time PCR



102 analysis of predominant bacteria in mouse feces. *Appl Environ Microbiol* 81:6749 –

103 6756. <https://doi.org/10.1128/AEM.01906-15>.

104

105

106
